# Supplementary material for: The regulation and function of CD20: an “enigma” of B-cell biology and targeted therapy
Source: PubMed Central journal article supplement — Haematologica. 2020 Jun;105(6):1494–506. doi: 10.3324/haematol.2019.243543 (PMC7271567; doi:10.3324/haematol.2019.243543), 2020-06
Supplement: 2019_243543-Disclosures_and_Contributions.pdf [file 2019_243543-Disclosures_and_Contributions.pdf]

Haematologica  
HAEMATOL/2019/243543  
Version 3

The regulation and function of CD20: an “enigma” of B cell biology and targeted therapy

Gabriela Pavlasova and Marek Mraz

Disclosures: Acknowledgements Supported by the Ministry of Health of the Czech Republic, grant No. NU20-03-00292. All rights reserved. This project has received funding from the European Research Council (ERC) under the European Union's Horizon 2020 research and innovation programme (grant agreement No 802644). Figures were created using BioRender graphical tool. We would like to thank Prof. Jiri Mayer, MD (Univ. Hospital Brno) for inspiring discussions about anti-CD20 mAbs. Disclosure of Conflicts of Interest The authors declare no competing financial interests.

Contributions: G.P. and M.M. wrote the manuscript
