# Supplementary material for: The regulation and function of CD20: an “enigma” of B-cell biology and targeted therapy
Source: PubMed Central journal article supplement — Haematologica. 2020 Jun;105(6):1494–506. doi: 10.3324/haematol.2019.243543 (PMC7271567; doi:10.3324/haematol.2019.243543), 2020-06

# Mechanisms of action of anti-CD20 mAbs and potential factors affecting resistance to anti-CD20 therapy in malignant B cells

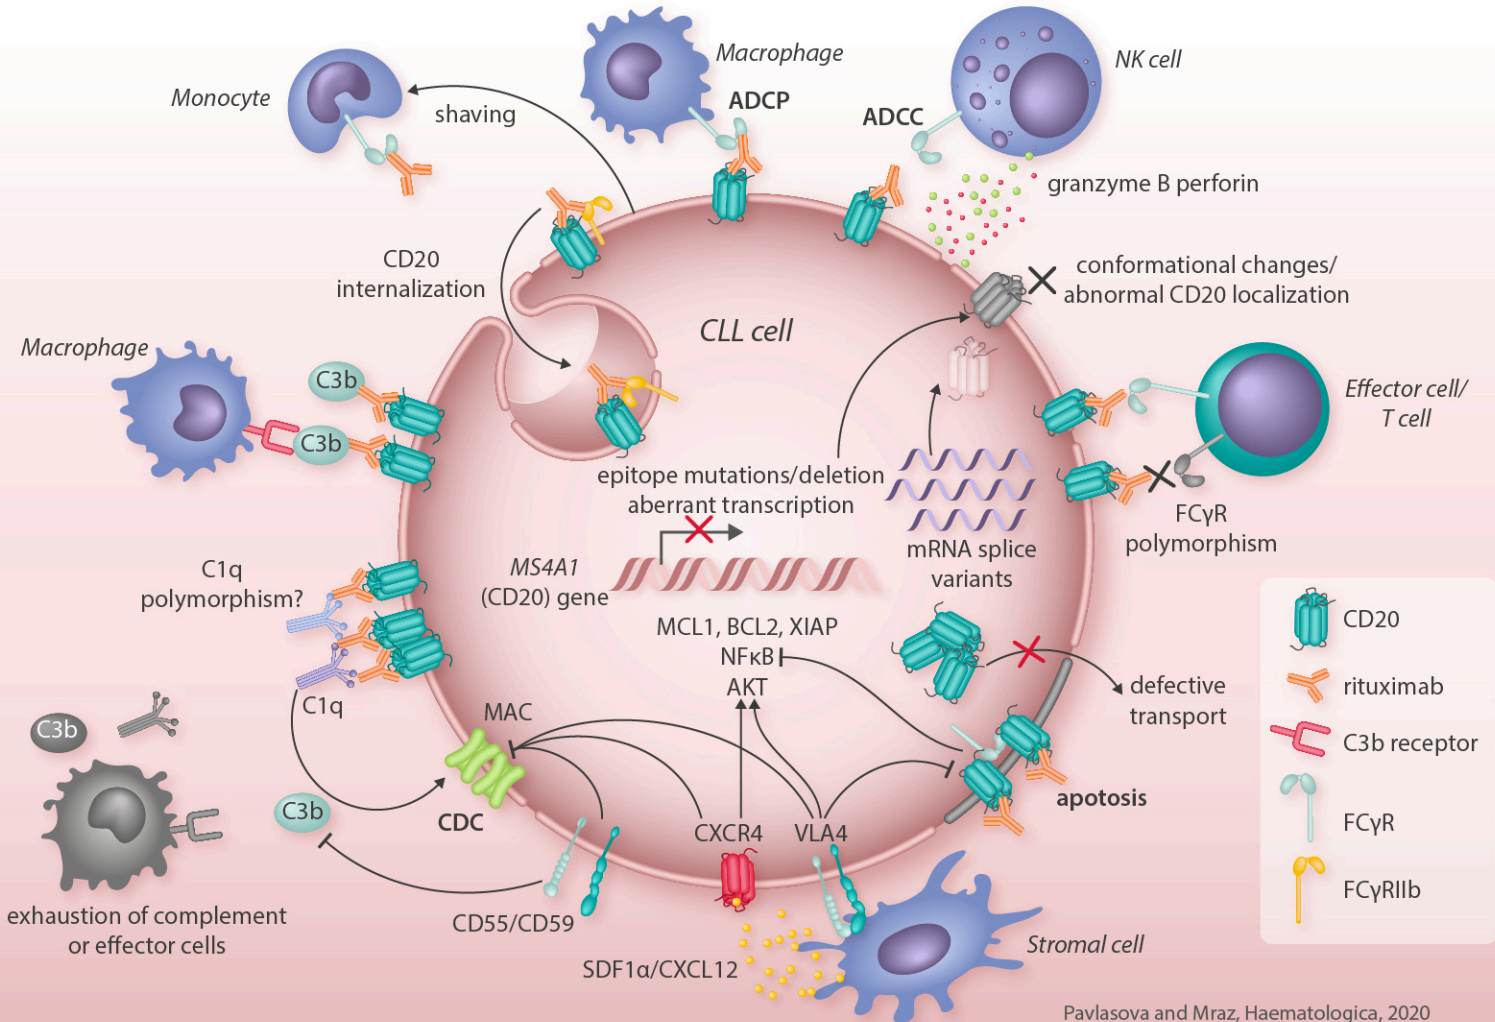

Supplement: HAEMATOL-2019-243543v3-Pavlasova-02.pdf [file HAEMATOL-2019-243543v3-Pavlasova-02.pdf]
